# Supplementary material for: What contributes to the internal mass-transport resistance of redox species through porous thin-film electrodes?
Source: Royal Society of Chemistry journal article supplement (doi:10.1039/d1cp05107e), 2022-01-01
Supplement: d1cp05107e1.pdf [file d1cp05107e1.pdf]

## What Contributes to the Internal Mass-Transport Resistance of Redox Species through Porous Thin-Film Electrodes?

Miji E Joy<sup>1</sup>, Anand Kumar Tripathi<sup>1</sup>, Divya Priyadarshani<sup>2</sup>, Debitree Choudhury<sup>1</sup>, and Manoj Neergat<sup>\*,1</sup>

<sup>1</sup>Department of Energy Science and Engineering

<sup>2</sup>Centre for Research in Nanotechnology & Science

Indian Institute of Technology Bombay (IITB), Powai, Mumbai 400076, India

\*Corresponding author. Tel.: +91 22 2576 7893; Fax: +91 22 2576 4890

E-mail: nmanoj@iitb.ac.in

### Supporting Information (SI)

#### EIS pattern of binder-free carbon-thin film electrode in 1 M H<sub>2</sub>SO<sub>4</sub>

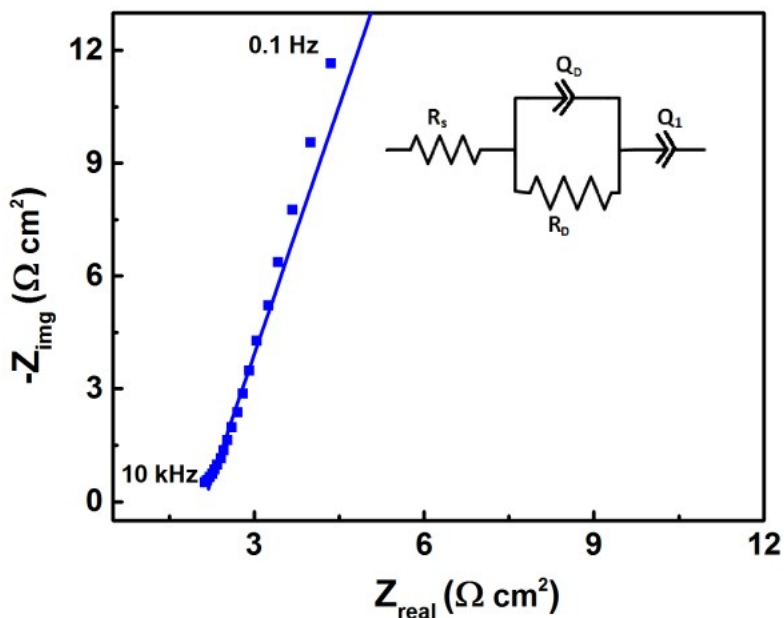

**Figure S1** Impedance of the binder-free electrode in the absence of redox species in 1 M H<sub>2</sub>SO<sub>4</sub>

## EIS pattern of BQ/BQH<sub>2</sub> in 1 M H<sub>2</sub>SO<sub>4</sub> on binder-free carbon thin-film

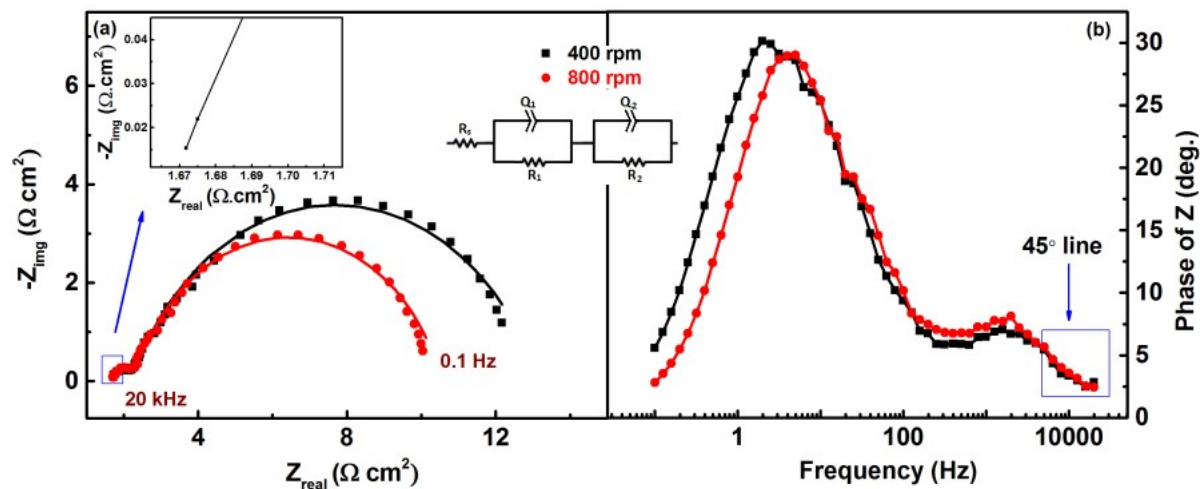

**Fig. S2(a)** Nyquist and **(b)** Bode plot of equimolar (5 mM) solution of BQ/BQH<sub>2</sub> in 1 M H<sub>2</sub>SO<sub>4</sub> on binder-free carbon thin-film on the GCD at 400 and 800 rpm, recorded at equilibrium potential (~0.7 V).

## Fitting parameters of BQ/BQH<sub>2</sub> on binder-free carbon-modified GCD

**Table ST1** Parameters obtained by fitting the EIS pattern recorded at equilibrium potential on binder-free carbon-modified GCD in equimolar solution (5 mM) of BQ/BQH<sub>2</sub> in 1 M H<sub>2</sub>SO<sub>4</sub>.

| Rotation Rate (rpm) | Parameter                       | Obtained fitting value | Relative standard error (%) | $\chi^2$ (Chi-square) | Relative error of the measured impedance |
|---------------------|---------------------------------|------------------------|-----------------------------|-----------------------|------------------------------------------|
| 400                 | $R_s$ ( $\Omega \text{ cm}^2$ ) | 1.86                   | 2.51                        | 0.0005                | 2.17                                     |
|                     | $R_1$ ( $\Omega \text{ cm}^2$ ) | 0.548                  | 6.32                        |                       |                                          |

|     |                                              |       |      |        |      |
|-----|----------------------------------------------|-------|------|--------|------|
|     | $Q_1$ (F cm <sup>-2</sup> s <sup>ϕ-1</sup> ) | 0.002 | 8.59 |        |      |
|     | $\phi_1$                                     | 0.753 | 9.76 |        |      |
|     | $R_2$ ( $\Omega$ cm <sup>2</sup> )           | 10.9  | 1.39 |        |      |
|     | $Q_2$ (F cm <sup>-2</sup> s <sup>ϕ-1</sup> ) | 0.024 | 2.51 |        |      |
|     | $\phi_2$                                     | 0.738 | 1.25 |        |      |
| 800 | $R_s$ ( $\Omega$ cm <sup>2</sup> )           | 1.76  | 1.10 | 0.0004 | 2.09 |
|     | $R_1$ ( $\Omega$ cm <sup>2</sup> )           | 0.64  | 6.87 |        |      |
|     | $Q_1$ (F cm <sup>-2</sup> s <sup>ϕ-1</sup> ) | 0.002 | 4.47 |        |      |
|     | $\phi_1$                                     | 0.789 | 6.6  |        |      |
|     | $R_2$ ( $\Omega$ cm <sup>2</sup> )           | 8.26  | 1.44 |        |      |
|     | $Q_2$ (F cm <sup>-2</sup> s <sup>ϕ-1</sup> ) | 0.018 | 3.06 |        |      |
|     | $\phi_2$                                     | 0.747 | 1.30 |        |      |

### Optimization of binder (Nafion) content

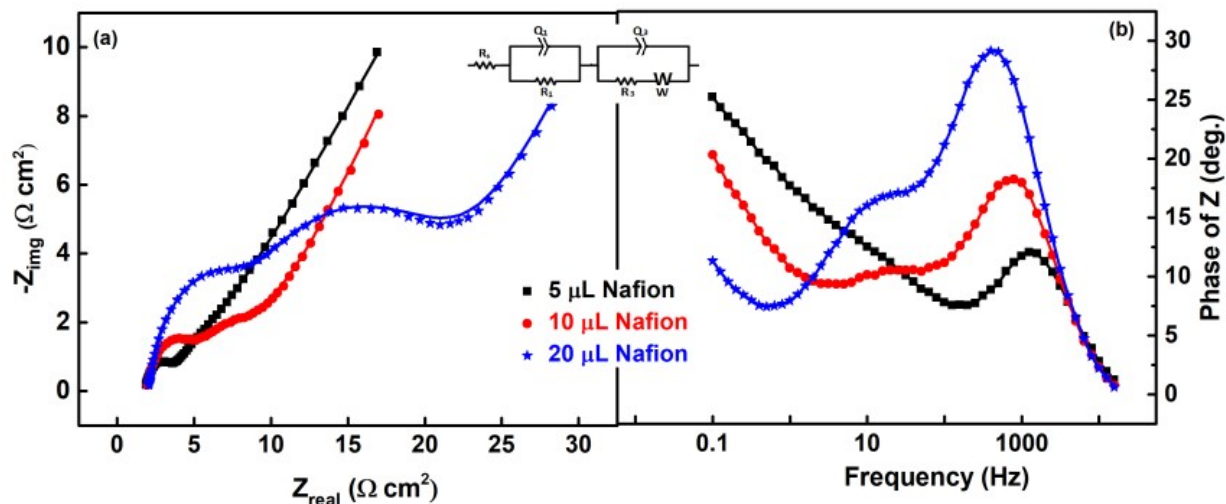

**Figure S3** (a) Nyquist and (b) Bode plots of equimolar solution of 5 mM BQ/BQH<sub>2</sub> in 1 M H<sub>2</sub>SO<sub>4</sub> at static condition of electrode for various Nafion contents.

### Fitting parameters of V<sup>5+</sup>/V<sup>4+</sup> on Nafion-free and Nafion-containing carbon-modified GCD

**Table ST2** Parameters obtained by fitting the EIS pattern recorded at equilibrium potential on Nafion-free and Nafion-containing carbon-modified GCD in equimolar solution (200 mM) of V<sup>5+</sup>/V<sup>4+</sup> in 3 M H<sub>2</sub>SO<sub>4</sub>.

| Electrode   | Parameter                                       | Obtained fitting value | Relative standard error (%) | $\chi^2$ (Chi-square) | Relative error of the measured impedance |
|-------------|-------------------------------------------------|------------------------|-----------------------------|-----------------------|------------------------------------------|
| Nafion-free | $R_s$ ( $\Omega \text{ cm}^2$ )                 | 0.803                  | 0.415                       | 0.00002               | 0.475                                    |
|             | $R_1$ ( $\Omega \text{ cm}^2$ )                 | 0.41                   | 0.250                       |                       |                                          |
|             | $Q_1$ ( $\text{F cm}^{-2} \text{ s}^{\phi-1}$ ) | 0.001                  | 1.85                        |                       |                                          |
|             | $\phi_1$                                        | 0.812                  | 0.281                       |                       |                                          |
|             | $R_3$ ( $\Omega \text{ cm}^2$ )                 | -                      | -                           |                       |                                          |
|             | $Q_3$ ( $\text{F cm}^{-2} \text{ s}^{\phi-1}$ ) | -                      | -                           |                       |                                          |
|             | $\phi_3$                                        | -                      | -                           |                       |                                          |

|                   |                                             |       |       |        |      |
|-------------------|---------------------------------------------|-------|-------|--------|------|
|                   | $W (\Omega \text{ cm}^2 \text{ s}^{-1/2})$  | 0.008 | 1.45  |        |      |
| Nafion-containing | $R_s (\Omega \text{ cm}^2)$                 | 0.93  | 0.932 | 0.0001 | 2.15 |
|                   | $R_1 (\Omega \text{ cm}^2)$                 | 1.36  | 8.71  |        |      |
|                   | $Q_1 (\text{F cm}^{-2} \text{ s}^{\phi-1})$ | 0.007 | 9.62  |        |      |
|                   | $\phi_1$                                    | 0.872 | 4.71  |        |      |
|                   | $R_3 (\Omega \text{ cm}^2)$                 | 9.94  | 7.36  |        |      |
|                   | $Q_3 (\text{F cm}^{-2} \text{ s}^{\phi-1})$ | 0.038 | 7.69  |        |      |
|                   | $\phi_3$                                    | 0.772 | 4.19  |        |      |
|                   | $W (\Omega \text{ cm}^2 \text{ s}^{-1/2})$  | 0.029 | 7.18  |        |      |

**Bode plots of  $V^{5+}/V^{4+}$  on Nafion-free and Nafion-containing carbon-modified GCD**

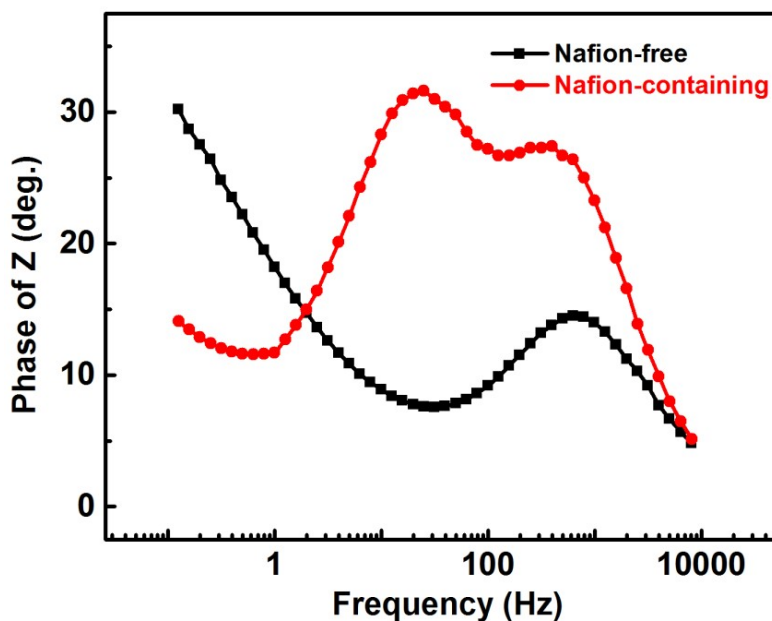

**Figure S4** Bode plots of equimolar (200 mM) solution of  $V^{5+}/V^{4+}$  in 3 M  $\text{H}_2\text{SO}_4$  on Nafion-free and Nafion-containing GCD.

**Fitting parameters of V<sup>5+</sup>/V<sup>4+</sup> on Nafion-containing carbon-modified GCD for various rotation rates**

**Table ST3** Parameters obtained by fitting the EIS patterns recorded at equilibrium potential (~0.86 V) on Nafion-containing carbon-modified GCD in equimolar (200 mM) solution of V<sup>5+</sup>/V<sup>4+</sup> in 3 M H<sub>2</sub>SO<sub>4</sub>.

| Rotation Rate (rpm) | Parameter                                                             | Obtained fitting value | Relative standard error (%) | $\chi^2$ (Chi-square) | Relative error of the measured impedance |
|---------------------|-----------------------------------------------------------------------|------------------------|-----------------------------|-----------------------|------------------------------------------|
| 400                 | R <sub>s</sub> ( $\Omega$ cm <sup>2</sup> )                           | 1.55                   | 0.618                       | 0.0004                | 2.11                                     |
|                     | R <sub>1</sub> ( $\Omega$ cm <sup>2</sup> )                           | 2.02                   | 6.79                        |                       |                                          |
|                     | Q <sub>1</sub> (F cm <sup>-2</sup> s <sup><math>\phi</math>-1</sup> ) | 0.007                  | 8.84                        |                       |                                          |
|                     | $\phi_1$                                                              | 0.917                  | 2.35                        |                       |                                          |
|                     | R <sub>2</sub> ( $\Omega$ cm <sup>2</sup> )                           | 12.1                   | 3.67                        |                       |                                          |
|                     | Q <sub>2</sub> (F cm <sup>-2</sup> s <sup><math>\phi</math>-1</sup> ) | 0.084                  | 2.56                        |                       |                                          |
|                     | $\phi_2$                                                              | 0.692                  | 3.16                        |                       |                                          |
| 800                 | R <sub>s</sub> ( $\Omega$ cm <sup>2</sup> )                           | 1.59                   | 0.594                       | 0.0005                | 2.19                                     |
|                     | R <sub>1</sub> ( $\Omega$ cm <sup>2</sup> )                           | 2.08                   | 3.39                        |                       |                                          |
|                     | Q <sub>1</sub> (F cm <sup>-2</sup> s <sup><math>\phi</math>-1</sup> ) | 0.009                  | 3.15                        |                       |                                          |
|                     | $\phi_1$                                                              | 0.873                  | 2.17                        |                       |                                          |
|                     | R <sub>2</sub> ( $\Omega$ cm <sup>2</sup> )                           | 9.6                    | 5.94                        |                       |                                          |
|                     | Q <sub>2</sub> (F cm <sup>-2</sup> s <sup><math>\phi</math>-1</sup> ) | 0.069                  | 8.98                        |                       |                                          |
|                     | $\phi_2$                                                              | 0.788                  | 5.94                        |                       |                                          |
| 1200                | R <sub>s</sub> ( $\Omega$ cm <sup>2</sup> )                           | 1.58                   | 0.494                       | 0.0003                | 1.83                                     |
|                     | R <sub>1</sub> ( $\Omega$ cm <sup>2</sup> )                           | 2.17                   | 4.05                        |                       |                                          |

|      |                                              |       |       |        |      |
|------|----------------------------------------------|-------|-------|--------|------|
|      | $Q_1$ (F cm <sup>-2</sup> s <sup>φ-1</sup> ) | 0.008 | 8.24  |        |      |
|      | $\phi_1$                                     | 0.874 | 1.63  |        |      |
|      | $R_2$ (Ω cm <sup>2</sup> )                   | 8.59  | 2.53  |        |      |
|      | $Q_2$ (F cm <sup>-2</sup> s <sup>φ-1</sup> ) | 0.063 | 2.69  |        |      |
|      | $\phi_2$                                     | 0.849 | 2.16  |        |      |
| 1600 | $R_s$ (Ω cm <sup>2</sup> )                   | 1.53  | 0.354 | 0.0002 | 1.32 |
|      | $R_1$ (Ω cm <sup>2</sup> )                   | 2.15  | 3.02  |        |      |
|      | $Q_1$ (F cm <sup>-2</sup> s <sup>φ-1</sup> ) | 0.008 | 6.26  |        |      |
|      | $\phi_1$                                     | 0.881 | 1.24  |        |      |
|      | $R_2$ (Ω cm <sup>2</sup> )                   | 7.08  | 1.91  |        |      |
|      | $Q_2$ (F cm <sup>-2</sup> s <sup>φ-1</sup> ) | 0.058 | 2.12  |        |      |
|      | $\phi_2$                                     | 0.869 | 1.61  |        |      |
| 2000 | $R_s$ (Ω cm <sup>2</sup> )                   | 1.52  | 0.313 | 0.0001 | 1.17 |
|      | $R_1$ (Ω cm <sup>2</sup> )                   | 2.20  | 2.64  |        |      |
|      | $Q_1$ (F cm <sup>-2</sup> s <sup>φ-1</sup> ) | 0.008 | 5.68  |        |      |
|      | $\phi_1$                                     | 0.886 | 1.10  |        |      |
|      | $R_2$ (Ω cm <sup>2</sup> )                   | 6.73  | 1.67  |        |      |
|      | $Q_2$ (F cm <sup>-2</sup> s <sup>φ-1</sup> ) | 0.054 | 1.93  |        |      |
|      | $\phi_2$                                     | 0.885 | 1.40  |        |      |
| 2400 | $R_s$ (Ω cm <sup>2</sup> )                   | 1.54  | 0.410 | 0.0002 | 1.41 |
|      | $R_1$ (Ω cm <sup>2</sup> )                   | 2.32  | 3.08  |        |      |
|      | $Q_1$ (F cm <sup>-2</sup> s <sup>φ-1</sup> ) | 0.008 | 6.57  |        |      |
|      | $\phi_1$                                     | 0.907 | 1.65  |        |      |

|  |                                             |       |      |  |  |
|--|---------------------------------------------|-------|------|--|--|
|  | $R_2 (\Omega \text{ cm}^2)$                 | 6.45  | 2.03 |  |  |
|  | $Q_2 (\text{F cm}^{-2} \text{ s}^{\phi-1})$ | 0.053 | 2.37 |  |  |
|  | $\phi_2$                                    | 0.876 | 1.29 |  |  |

**Fitting parameters of BQ/BQH<sub>2</sub> on Nafion-free and Nafion-containing carbon-modified GCD**

**Table ST4** Parameters obtained by fitting the EIS pattern recorded at equilibrium potential on Nafion-free and Nafion-containing carbon-modified GCD in equimolar solution (5 mM) of BQ/BQH<sub>2</sub> in 1 M H<sub>2</sub>SO<sub>4</sub>.

| Electrode         | Parameter                                   | Obtained fitting value | Relative standard error (%) | $\chi^2$ (Chi-square) | Relative error of the measured impedance |
|-------------------|---------------------------------------------|------------------------|-----------------------------|-----------------------|------------------------------------------|
| Nafion-free       | $R_s (\Omega \text{ cm}^2)$                 | 1.74                   | 1.79                        | 0.0006                | 2.37                                     |
|                   | $R_1 (\Omega \text{ cm}^2)$                 | 0.225                  | 7.68                        |                       |                                          |
|                   | $Q_1 (\text{F cm}^{-2} \text{ s}^{\phi-1})$ | 0.0001                 | 5.19                        |                       |                                          |
|                   | $\phi_1$                                    | 1                      | 8.35                        |                       |                                          |
|                   | $R_3 (\Omega \text{ cm}^2)$                 | 1.71                   | 4.53                        |                       |                                          |
|                   | $Q_3 (\text{F cm}^{-2} \text{ s}^{\phi-1})$ | 0.073                  | 9.2                         |                       |                                          |
|                   | $\phi_3$                                    | 0.85                   | 5.18                        |                       |                                          |
|                   | $W (\Omega \text{ cm}^2 \text{ s}^{-1/2})$  | 0.004                  | 3.25                        |                       |                                          |
| Nafion-containing | $R_s (\Omega \text{ cm}^2)$                 | 2.01                   | 0.377                       | 0.0001                | 0.989                                    |
|                   | $R_1 (\Omega \text{ cm}^2)$                 | 5.80                   | 5.57                        |                       |                                          |
|                   | $Q_1 (\text{F cm}^{-2} \text{ s}^{\phi-1})$ | 0.0003                 | 6.24                        |                       |                                          |
|                   | $\phi_1$                                    | 0.87                   | 1.27                        |                       |                                          |



|  |                                             |       |      |  |  |
|--|---------------------------------------------|-------|------|--|--|
|  | $R_3 (\Omega \text{ cm}^2)$                 | 14.2  | 3.96 |  |  |
|  | $Q_3 (\text{F cm}^{-2} \text{ s}^{\phi-1})$ | 0.005 | 4.88 |  |  |
|  | $\phi_3$                                    | 0.73  | 2.99 |  |  |
|  | $W (\Omega \text{ cm}^2 \text{ s}^{-1/2})$  | 0.004 | 1.78 |  |  |

**Bode plots of BQ/BQH<sub>2</sub> on Nafion-free and Nafion-containing carbon-modified GCD**

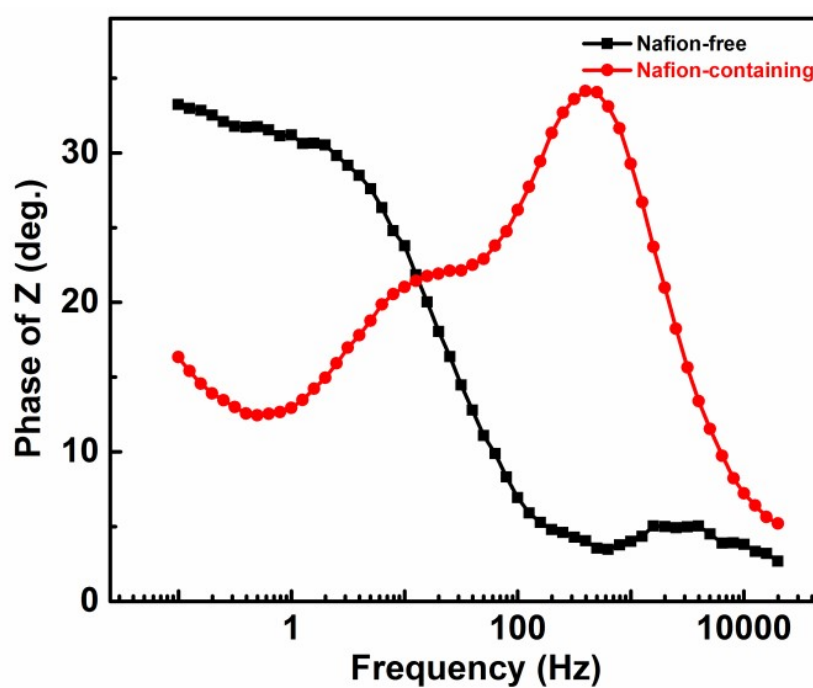

**Figure S5** Bode plots of equimolar (5 mM) solution of BQ/BQH<sub>2</sub> in 1 M H<sub>2</sub>SO<sub>4</sub> on Nafion-free and Nafion-containing GCD.

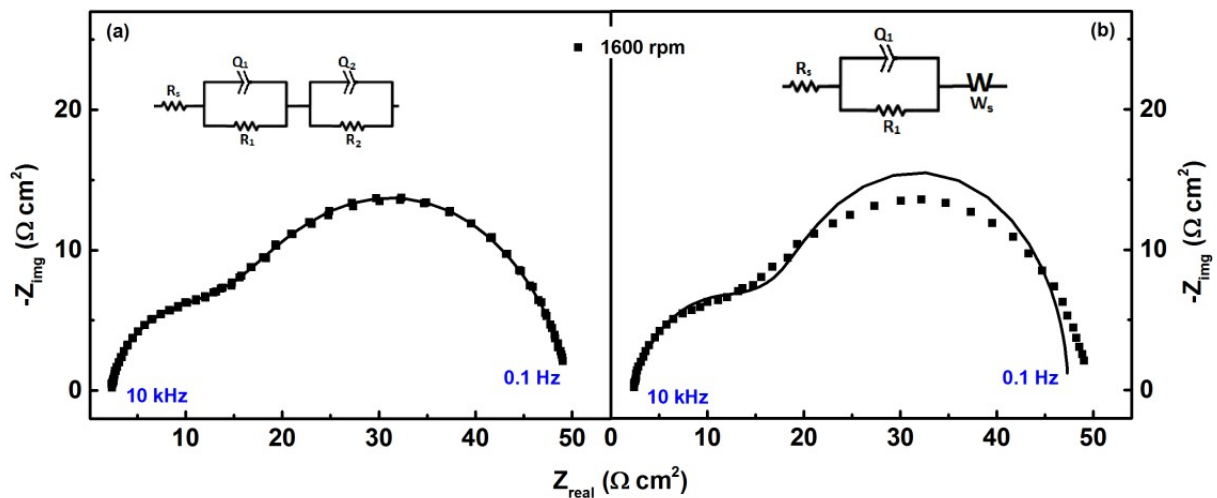

**Figure S6** Nyquist plots recorded at equilibrium potential on Nafion-containing electrode (20  $\mu\text{L}$ ) in equimolar solution (5 mM) of BQ/BQH<sub>2</sub> (1:1) in 1 M H<sub>2</sub>SO<sub>4</sub>. The respective equivalent circuits are shown in the inset.

The EIS patterns recorded at 1600 rpm are fitted with (a) a series combination of  $R_s$  (solution resistance),  $(R_1, Q_1)$  element (charge-transfer process at the high frequency region), and  $(R_2, Q_2)$  element (mass-transfer process; unresolved and distorted semicircle); (b) a series combination of  $R_s$  (solution resistance),  $(Q_1, (R_1, W_s))$  element (charge-transfer process at the high frequency region and finite length transmissive mass-transport at the low frequency region). The  $\chi^2$  (Chi-square) is lower when the equivalent circuit consists of two (R, Q) elements. Their respective circuit parameters are given below.

**Table ST5** Parameters obtained by fitting the EIS pattern recorded at equilibrium potential on Nafion-containing (20  $\mu\text{L}$ ) electrode at 1600 rpm in equimolar solution of 5 mM BQ/BQH<sub>2</sub> in 1 M H<sub>2</sub>SO<sub>4</sub>. The EC used for fitting the data is shown in Fig. S6(a).

| Parameter | Obtained fitting | Relative |  | Relative error of |
|-----------|------------------|----------|--|-------------------|
|-----------|------------------|----------|--|-------------------|

|                          | value   | standard error<br>(%) | $\chi^2$ (Chi-square) | the measured<br>impedance |
|--------------------------|---------|-----------------------|-----------------------|---------------------------|
| $R_s$ ( $\Omega$ )       | 10.4    | 0.99                  | 0.0002                | 1.38                      |
| $R_1$ ( $\Omega$ )       | 50.94   | 3.68                  |                       |                           |
| $Q_1$ ( $F s^{\phi-1}$ ) | 0.00006 | 6.37                  |                       |                           |
| $\phi_1$                 | 0.845   | 1.13                  |                       |                           |
| $R_2$ ( $\Omega$ )       | 201.1   | 1.61                  |                       |                           |
| $Q_2$ ( $F s^{\phi-1}$ ) | 0.0006  | 2.39                  |                       |                           |
| $\phi_2$                 | 0.784   | 1.47                  |                       |                           |

**Table ST6** Parameters obtained by fitting the EIS pattern recorded at equilibrium potential on Nafion-containing (20  $\mu$ L) electrode at 1600 rpm in equimolar solution of 5 mM BQ/BQH<sub>2</sub> in 1 M H<sub>2</sub>SO<sub>4</sub>. The EC used for fitting the data is shown in Fig. S6(a).

| Parameter                | Obtained fitting<br>value | Relative<br>standard error<br>(%) | $\chi^2$ (Chi-square) | Relative error of<br>the measured<br>impedance |
|--------------------------|---------------------------|-----------------------------------|-----------------------|------------------------------------------------|
| $R_s$ ( $\Omega$ )       | 10.35                     | 2.45                              | 0.002                 | 4.75                                           |
| $R_1$ ( $\Omega$ )       | 45.77                     | 6.54                              |                       |                                                |
| $Q_1$ ( $F s^{\phi-1}$ ) | 0.00007                   | 20.2                              |                       |                                                |
| $\phi_1$                 | 0.889                     | 3.22                              |                       |                                                |
| $W_s-Y_o$                | 0.002                     | 3.47                              |                       |                                                |
| $W_s-B$                  | 0.393                     | 2.62                              |                       |                                                |

$\chi^2$ (Chi-square) value and the relative error in the measure of the impedance are the least for the circuit contains two (R, Q) elements. It appears that the circuit containing two (R, Q) elements are the best suited for fitting of BQ/BQH<sub>2</sub> EIS patterns.

### F-test for the EC of EIS patterns recorded under hydrodynamic conditions on Nafion-containing electrode

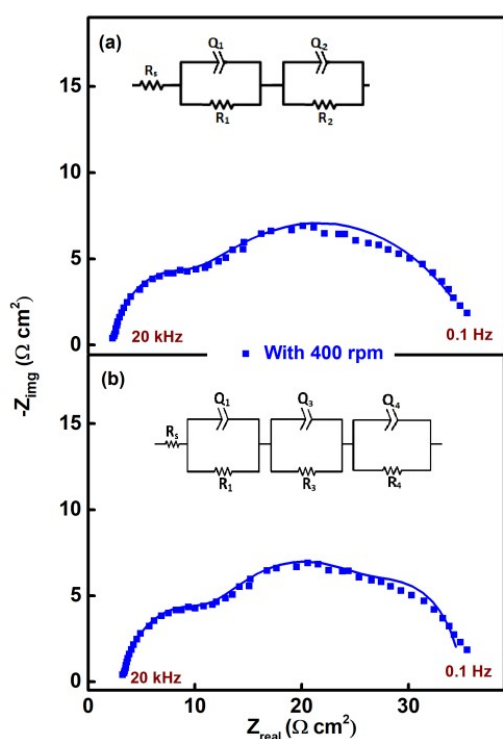

**Figure S7** Nyquist plots recorded at equilibrium potential on Nafion-containing electrode in equimolar solution (5 mM) of BQ/BQH<sub>2</sub> (1:1) in 1 M H<sub>2</sub>SO<sub>4</sub>. The respective equivalent circuits are shown in the inset.

The EIS patterns recorded at 400 rpm are fitted with (a) a series combination of  $R_s$  (solution resistance),  $(R_1, Q_1)$  element (charge-transfer process at the high frequency region), and  $(R_2, Q_2)$

element (mass-transfer process; unresolved and distorted semicircle); (b) a series combination of  $R_s$  (solution resistance),  $(R_1, Q_1)$  element (charge-transfer process at the high frequency region),  $(R_3, Q_3)$  element (internal mass-transfer process at the mid-frequency region), and  $(R_4, Q_4)$  (external mass-transfer process at the low frequency region), respectively. The fitting of mid-frequency and low-frequency features in the Nyquist plots are different in both the cases. The  $\chi^2$  (Chi-square) is lower when the equivalent circuit consists of three (R, Q) elements. Further clarification is obtained from F-test.

**Table ST7** Parameters obtained by fitting the EIS pattern recorded at equilibrium potential on Nafion-containing electrode at 400 rpm in equimolar solution of 5 mM BQ/BQH<sub>2</sub> in 1 M H<sub>2</sub>SO<sub>4</sub>. The EC used for fitting the data is shown in Fig. S7(a).

| Parameter                                       | Obtained fitting value | Relative standard error (%) | $\chi^2$ (Chi-square) | Relative error of the measured impedance |
|-------------------------------------------------|------------------------|-----------------------------|-----------------------|------------------------------------------|
| $R_s$ ( $\Omega \text{ cm}^2$ )                 | 2.09                   | 2.39                        | 0.0006                | 2.52                                     |
| $R_1$ ( $\Omega \text{ cm}^2$ )                 | 5.82                   | 4.17                        |                       |                                          |
| $Q_1$ ( $\text{F cm}^{-2} \text{ s}^{\phi-1}$ ) | 0.0002                 | 3.0                         |                       |                                          |
| $\phi_1$                                        | 0.96                   | 5.66                        |                       |                                          |
| $R_2$ ( $\Omega \text{ cm}^2$ )                 | 29.14                  | 4.89                        |                       |                                          |
| $Q_2$ ( $\text{F cm}^{-2} \text{ s}^{\phi-1}$ ) | 0.006                  | 4.69                        |                       |                                          |
| $\phi_2$                                        | 0.537                  | 4.71                        |                       |                                          |

**Table ST8** Parameters obtained by fitting the EIS pattern recorded at equilibrium potential on Nafion-containing electrode at 400 rpm in equimolar solution of 5 mM BQ/BQH<sub>2</sub> in 1 M H<sub>2</sub>SO<sub>4</sub>. The EC used for fitting the data is shown in Fig. S7(b).

| Parameter                                             | Obtained fitting value | Relative standard error (%) | $\chi^2$ (Chi-square) | Relative error of the measured impedance |
|-------------------------------------------------------|------------------------|-----------------------------|-----------------------|------------------------------------------|
| R <sub>s</sub> (Ω cm <sup>2</sup> )                   | 2.03                   | 1.267                       | 0.0005                | 2.22                                     |
| R <sub>1</sub> (Ω cm <sup>2</sup> )                   | 6.62                   | 1.61                        |                       |                                          |
| Q <sub>1</sub> (F cm <sup>-2</sup> s <sup>φ-1</sup> ) | 0.0003                 | 1.688                       |                       |                                          |
| φ <sub>1</sub>                                        | 0.86                   | 3.548                       |                       |                                          |
| R <sub>3</sub> (Ω cm <sup>2</sup> )                   | 7.69                   | 2.5                         |                       |                                          |
| Q <sub>3</sub> (F cm <sup>-2</sup> s <sup>φ-1</sup> ) | 0.050                  | 3.1                         |                       |                                          |
| φ <sub>3</sub>                                        | 0.92                   | 1.71                        |                       |                                          |
| R <sub>4</sub> (Ω cm <sup>2</sup> )                   | 17.46                  | 2.67                        |                       |                                          |
| Q <sub>4</sub> (F cm <sup>-2</sup> s <sup>φ-1</sup> ) | 0.0003                 | 2.56                        |                       |                                          |
| φ <sub>4</sub>                                        | 0.773                  | 1.236                       |                       |                                          |

$$F(\alpha, k, 2N-m-k) = 2.68869$$

Where, k=3, m=7 and N=59, α = 0.05

$$F_{exp} = \frac{\frac{S_1 - S_2}{(2N - m) - (2N - m - k)}}{S_2} = \frac{\frac{S_1 - S_2}{k}}{\frac{S_2}{2N - m - k}}$$

$$S_1 = 2.52, S_2 = 2.221$$

$$F_{exp} = \frac{\frac{0.299}{3}}{\frac{2.221}{108}} = 4.846$$

Since  $F_{exp} > F(\alpha, k, 2N-m-k)$ , the model consisting of three (R, Q) elements can be accepted in the manuscript for 20  $\mu$ l Nafion-concentration.

**Equivalent circuit fitting parameters of BQ/BQH<sub>2</sub> on Nafion-containing electrode recorded at various rotation rates**

**Table ST9** Parameters obtained by fitting the EIS pattern recorded at equilibrium potential on N (20) electrode in equimolar solution of 5 mM BQ/BQH<sub>2</sub> in 1 M H<sub>2</sub>SO<sub>4</sub>.

Here, at 400 rpm, Nyquist plot is fitted with three (R, Q) elements in the EC. The parameters are shown in Table ST6.

| Rotation Rate (rpm) | Parameter                                                    | Obtained fitting value | Relative standard error (%) | $\chi^2$ (Chi-square) | Relative error of the measured impedance |
|---------------------|--------------------------------------------------------------|------------------------|-----------------------------|-----------------------|------------------------------------------|
| 800                 | $R_s$ ( $\Omega$ cm <sup>2</sup> )                           | 2.03                   | 1.47                        | 0.0008                | 2.89                                     |
|                     | $R_1$ ( $\Omega$ cm <sup>2</sup> )                           | 8.53                   | 7.23                        |                       |                                          |
|                     | $Q_1$ (F cm <sup>-2</sup> s <sup><math>\phi</math>-1</sup> ) | 0.0003                 | 7.22                        |                       |                                          |
|                     | $\phi_1$                                                     | 0.885                  | 3.06                        |                       |                                          |
|                     | $R_2$ ( $\Omega$ cm <sup>2</sup> )                           | 32.5                   | 4.23                        |                       |                                          |
|                     | $Q_2$ (F cm <sup>-2</sup> s <sup><math>\phi</math>-1</sup> ) | 0.003                  | 5.65                        |                       |                                          |

|      |                                             |        |       |         |       |
|------|---------------------------------------------|--------|-------|---------|-------|
|      | $\phi_2$                                    | 0.725  | 3.91  |         |       |
| 1200 | $R_s (\Omega \text{ cm}^2)$                 | 2.13   | 0.767 | 0.0002  | 1.40  |
|      | $R_1 (\Omega \text{ cm}^2)$                 | 9.11   | 4.27  |         |       |
|      | $Q_1 (\text{F cm}^{-2} \text{ s}^{\phi-1})$ | 0.0003 | 2.52  |         |       |
|      | $\phi_1$                                    | 0.871  | 1.25  |         |       |
|      | $R_2 (\Omega \text{ cm}^2)$                 | 37.69  | 1.72  |         |       |
|      | $Q_2 (\text{F cm}^{-2} \text{ s}^{\phi-1})$ | 0.003  | 7.20  |         |       |
|      | $\phi_2$                                    | 0.749  | 1.61  |         |       |
| 1600 | $R_s (\Omega \text{ cm}^2)$                 | 2.038  | 0.99  | 0.0002  | 1.38  |
|      | $R_1 (\Omega \text{ cm}^2)$                 | 9.98   | 3.68  |         |       |
|      | $Q_1 (\text{F cm}^{-2} \text{ s}^{\phi-1})$ | 0.0003 | 6.37  |         |       |
|      | $\phi_1$                                    | 0.845  | 1.13  |         |       |
|      | $R_2 (\Omega \text{ cm}^2)$                 | 39.4   | 1.61  |         |       |
|      | $Q_2 (\text{F cm}^{-2} \text{ s}^{\phi-1})$ | 0.003  | 2.39  |         |       |
|      | $\phi_2$                                    | 0.784  | 1.47  |         |       |
| 2000 | $R_s (\Omega \text{ cm}^2)$                 | 1.98   | 0.551 | 0.00009 | 0.953 |
|      | $R_1 (\Omega \text{ cm}^2)$                 | 10.39  | 2.67  |         |       |
|      | $Q_1 (\text{F cm}^{-2} \text{ s}^{\phi-1})$ | 0.0003 | 4.01  |         |       |
|      | $\phi_1$                                    | 0.853  | 0.723 |         |       |
|      | $R_2 (\Omega \text{ cm}^2)$                 | 40.29  | 1.16  |         |       |
|      | $Q_2 (\text{F cm}^{-2} \text{ s}^{\phi-1})$ | 0.003  | 1.67  |         |       |
|      | $\phi_2$                                    | 0.782  | 1.03  |         |       |
| 2400 | $R_s (\Omega \text{ cm}^2)$                 | 2.11   | 0.798 | 0.00001 | 1.23  |



|  |                                                 |        |      |  |  |
|--|-------------------------------------------------|--------|------|--|--|
|  | $R_1$ ( $\Omega \text{ cm}^2$ )                 | 11.05  | 3.86 |  |  |
|  | $Q_1$ ( $\text{F cm}^{-2} \text{ s}^{\phi-1}$ ) | 0.0003 | 5.43 |  |  |
|  | $\phi_1$                                        | 0.844  | 1.01 |  |  |
|  | $R_2$ ( $\Omega \text{ cm}^2$ )                 | 40.68  | 1.86 |  |  |
|  | $Q_2$ ( $\text{F cm}^{-2} \text{ s}^{\phi-1}$ ) | 0.003  | 2.48 |  |  |
|  | $\phi_2$                                        | 0.779  | 1.54 |  |  |

### Interaction of the redox species with Nafion for various rotation rates

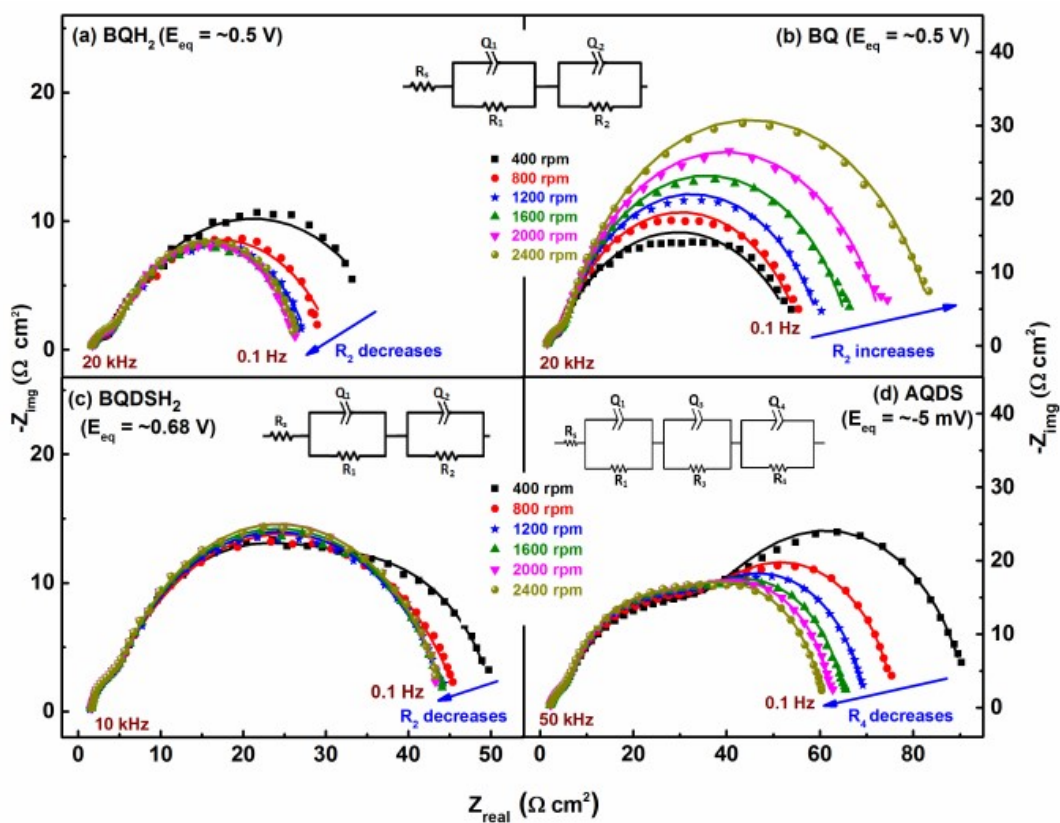

**Figure S8** EIS patterns of 5 mM (a) BQH<sub>2</sub> (b) BQ (c) BQDSH<sub>2</sub> and (d) AQDS in 1 M H<sub>2</sub>SO<sub>4</sub> recorded at equilibrium potential on Nafion-containing carbon thin-film for various rotation rate

of the electrode. ECs are given in the inset. The symbols and solid lines show experimental and fitted data, respectively.

### Interaction of the redox species with Nafion for various time intervals

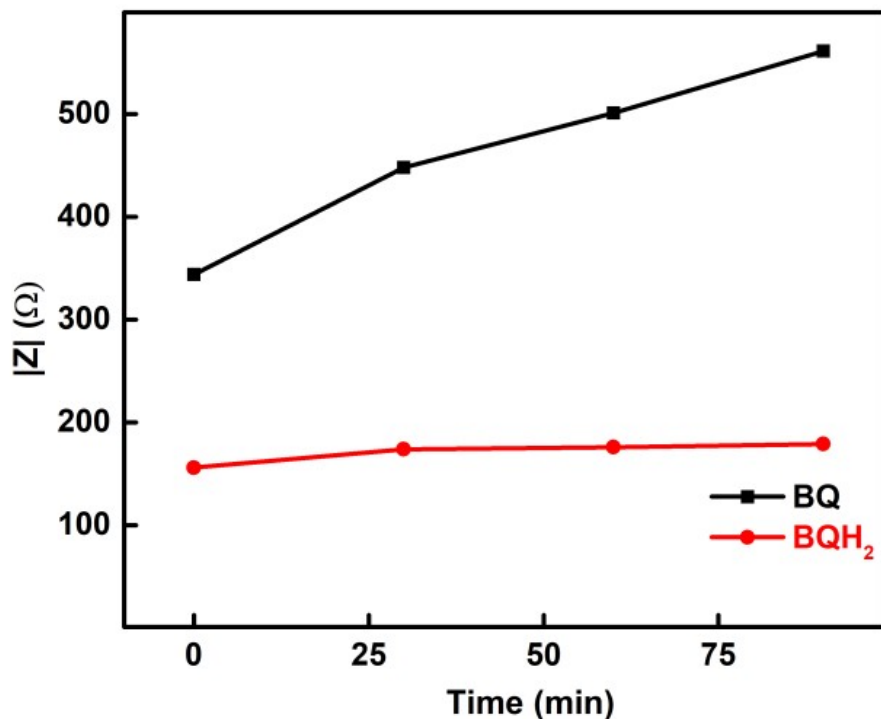

**Figure S9** Time dependence on impedance under hydrodynamic condition (1600 rpm) for (a) 5 mM BQ and (b) 5 mM BQH<sub>2</sub> in 1 M H<sub>2</sub>SO<sub>4</sub> at equilibrium potential (~700mV) for equal time intervals on Nafion-containing carbon-thin film.

**Table ST10** Different organic redox species are checked for Nafion interaction

| Redox species | Interaction with Nafion |
|---------------|-------------------------|
|               |                         |

|                                                                                                                                                                         |   |
|-------------------------------------------------------------------------------------------------------------------------------------------------------------------------|---|
| 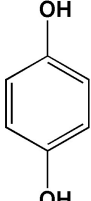 <p>Hydroquinone (BQH<sub>2</sub>)</p>                                                 | × |
|  <p>p-benzoquinone (BQ)</p>                                                            | ✓ |
|  <p>4,5-dihydroxy-1,3-benzenedisulfonic acid<br/>disodium salt (BQDSH<sub>2</sub>)</p> | × |
|  <p>Anthraquinone-2,7-disulfonic acid disodium salt (AQDS)</p>                       | × |

### Comparison of kinetics

**Table ST11** Comparison of kinetics of the redox couple at stationary condition

| Redox system | Electrode modification | R <sub>1</sub> (Ω) *Concentration (M)<br>(Bulk) |
|--------------|------------------------|-------------------------------------------------|
|              |                        |                                                 |

|                                                               |                   |       |
|---------------------------------------------------------------|-------------------|-------|
| V <sup>5+</sup> /V <sup>4+</sup> (200 mM, equimolar solution) | Nafion-free       | 0.08  |
| V <sup>5+</sup> /V <sup>4+</sup> (200 mM, equimolar solution) | Nafion-containing | 0.272 |
| BQ/BQH <sub>2</sub> (5 mM, equimolar solution)                | Nafion-free       | 0.001 |
| BQ/BQH <sub>2</sub> (5 mM, equimolar solution)                | Nafion-containing | 0.029 |
| AQDS/AQDSH <sub>2</sub> (5 mM)                                | Nafion-free       | 0.007 |
| AQDS/AQDSH <sub>2</sub> (5 mM)                                | Nafion-containing | 0.021 |

**Fitting parameters of AQDS/AQDSH<sub>2</sub> on Nafion-free and Nafion-containing carbon-modified GCD**

**Table ST12** Parameters obtained by fitting the EIS pattern recorded at equilibrium potential (~195 mV) on Nafion-free and Nafion-containing carbon-modified GCD in 5 mM of AQDSH<sub>2</sub> dissolved in 1 M H<sub>2</sub>SO<sub>4</sub>.

| Electrode   | Parameter                                                             | Obtained fitting value | Relative standard error (%) | $\chi^2$ (Chi-square) | Relative error of the measured impedance |
|-------------|-----------------------------------------------------------------------|------------------------|-----------------------------|-----------------------|------------------------------------------|
| Nafion-free | R <sub>s</sub> ( $\Omega$ cm <sup>2</sup> )                           | 1.82                   | 5.09                        | 0.0003                | 1.82                                     |
|             | R <sub>1</sub> ( $\Omega$ cm <sup>2</sup> )                           | 1.47                   | 6.06                        |                       |                                          |
|             | Q <sub>1</sub> (F cm <sup>-2</sup> s <sup><math>\phi</math>-1</sup> ) | 0.0001                 | 5.02                        |                       |                                          |
|             | $\phi_1$                                                              | 0.774                  | 8.67                        |                       |                                          |

|                           |                                             |         |      |        |      |
|---------------------------|---------------------------------------------|---------|------|--------|------|
|                           | $R_3 (\Omega \text{ cm}^2)$                 | 24.46   | 4.77 |        |      |
|                           | $Q_3 (\text{F cm}^{-2} \text{ s}^{\phi-1})$ | 0.005   | 4.57 |        |      |
|                           | $\phi_3$                                    | 0.783   | 1.16 |        |      |
|                           | $W (\Omega \text{ cm}^2 \text{ s}^{-1/2})$  | 0.0009  | 1.89 |        |      |
| Nafion-<br>contain<br>ing | $R_s (\Omega \text{ cm}^2)$                 | 1.97    | 1.86 | 0.0007 | 2.17 |
|                           | $R_1 (\Omega \text{ cm}^2)$                 | 4.24    | 3.2  |        |      |
|                           | $Q_1 (\text{F cm}^{-2} \text{ s}^{\phi-1})$ | 0.0003  | 4.35 |        |      |
|                           | $\phi_1$                                    | 0.768   | 6.48 |        |      |
|                           | $R_3 (\Omega \text{ cm}^2)$                 | 43.39   | 4.45 |        |      |
|                           | $Q_3 (\text{F cm}^{-2} \text{ s}^{\phi-1})$ | 0.00061 | 9.48 |        |      |
|                           | $\phi_3$                                    | 0.769   | 2.89 |        |      |
|                           | $W (\Omega \text{ cm}^2 \text{ s}^{-1/2})$  | 0.00054 | 2.47 |        |      |

**Bode plots of AQDS/AQDSH<sub>2</sub> on Nafion-free and Nafion-containing carbon-modified GCD**

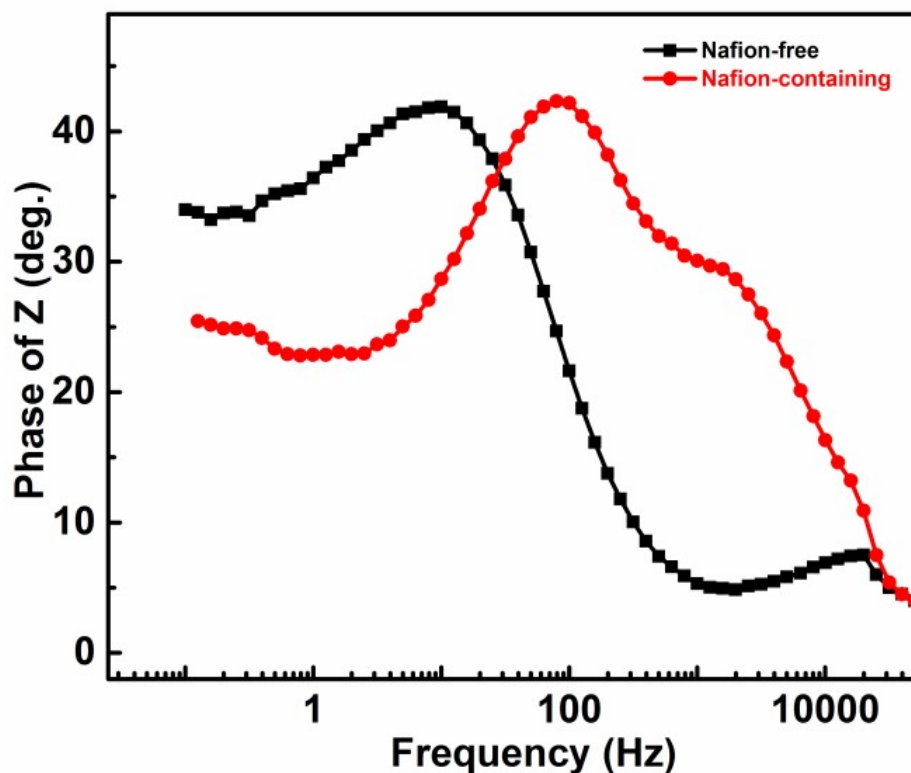

**Figure S10** Bode plots of 5 mM AQDSH<sub>2</sub> dissolved in 1 M H<sub>2</sub>SO<sub>4</sub> on Nafion-free and Nafion-containing GCD recorded at equilibrium potential (~195 mV).

**Equivalent circuit fitting parameters of AQDS/AQDSH<sub>2</sub> on Nafion-free and Nafion-containing electrodes recorded at various rotation rates**

**Table ST13** Parameters obtained by fitting the EIS pattern recorded at equilibrium potential (~195 mV) for various rotation rates on Nafion-free carbon-modified GCD in 5 mM of AQDSH<sub>2</sub> dissolved in 1 M H<sub>2</sub>SO<sub>4</sub>.

| Rotation speed of the electrode | Parameter | Obtained fitting value | Relative standard error (%) | $\chi^2$ (Chi-square) | Relative error of the measured impedance |
|---------------------------------|-----------|------------------------|-----------------------------|-----------------------|------------------------------------------|
|                                 |           |                        |                             |                       |                                          |

|       |                                                 |        |      |        |       |
|-------|-------------------------------------------------|--------|------|--------|-------|
| (rpm) |                                                 |        |      |        |       |
| 400   | $R_s$ ( $\Omega \text{ cm}^2$ )                 | 1.76   | 4.07 | 0.0002 | 1.41  |
|       | $R_1$ ( $\Omega \text{ cm}^2$ )                 | 1.47   | 2.34 |        |       |
|       | $Q_1$ ( $\text{F cm}^{-2} \text{ s}^{\phi-1}$ ) | 0.0002 | 7.4  |        |       |
|       | $\phi_1$                                        | 0.91   | 6.9  |        |       |
|       | $R_3$ ( $\Omega \text{ cm}^2$ )                 | 11.05  | 3.43 |        |       |
|       | $Q_3$ ( $\text{F cm}^{-2} \text{ s}^{\phi-1}$ ) | 0.005  | 2.75 |        |       |
|       | $\phi_3$                                        | 0.793  | 1.1  |        |       |
|       | $R_4$ ( $\Omega \text{ cm}^2$ )                 | 35.4   | 4.16 |        |       |
|       | $Q_4$ ( $\text{F cm}^{-2} \text{ s}^{\phi-1}$ ) | 0.013  | 4.57 |        |       |
|       | $\phi_4$                                        | 0.76   | 2.09 |        |       |
| 800   | $R_s$ ( $\Omega \text{ cm}^2$ )                 | 1.78   | 4.07 | 0.0001 | 1.125 |
|       | $R_1$ ( $\Omega \text{ cm}^2$ )                 | 1.47   | 7.34 |        |       |
|       | $Q_1$ ( $\text{F cm}^{-2} \text{ s}^{\phi-1}$ ) | 0.0003 | 7.4  |        |       |
|       | $\phi_1$                                        | 0.89   | 6.9  |        |       |
|       | $R_3$ ( $\Omega \text{ cm}^2$ )                 | 11.05  | 3.43 |        |       |
|       | $Q_3$ ( $\text{F cm}^{-2} \text{ s}^{\phi-1}$ ) | 0.006  | 3.95 |        |       |
|       | $\phi_3$                                        | 0.79   | 1.23 |        |       |
|       | $R_4$ ( $\Omega \text{ cm}^2$ )                 | 27.9   | 3.96 |        |       |
|       | $Q_4$ ( $\text{F cm}^{-2} \text{ s}^{\phi-1}$ ) | 0.008  | 3.95 |        |       |
|       | $\phi_4$                                        | 0.97   | 1.75 |        |       |
| 1200  | $R_s$ ( $\Omega \text{ cm}^2$ )                 | 1.81   | 5.75 |        |       |
|       | $R_1$ ( $\Omega \text{ cm}^2$ )                 | 1.51   | 1.79 |        |       |

|      |                                              |        |      |         |       |
|------|----------------------------------------------|--------|------|---------|-------|
|      | $Q_1$ (F cm <sup>-2</sup> s <sup>φ-1</sup> ) | 0.0003 | 4.18 | 0.00009 | 0.94  |
|      | $\phi_1$                                     | 0.87   | 5.6  |         |       |
|      | $R_3$ (Ω cm <sup>2</sup> )                   | 11.22  | 7.6  |         |       |
|      | $Q_3$ (F cm <sup>-2</sup> s <sup>φ-1</sup> ) | 0.005  | 4.18 |         |       |
|      | $\phi_3$                                     | 0.80   | 1.39 |         |       |
|      | $R_4$ (Ω cm <sup>2</sup> )                   | 24.6   | 3.8  |         |       |
|      | $Q_4$ (F cm <sup>-2</sup> s <sup>φ-1</sup> ) | 0.007  | 3.85 |         |       |
|      | $\phi_4$                                     | 0.94   | 1.4  |         |       |
| 1600 | $R_s$ (Ω cm <sup>2</sup> )                   | 1.81   | 3.52 | 0.00007 | 0.847 |
|      | $R_1$ (Ω cm <sup>2</sup> )                   | 1.51   | 2.79 |         |       |
|      | $Q_1$ (F cm <sup>-2</sup> s <sup>φ-1</sup> ) | 0.0003 | 4.18 |         |       |
|      | $\phi_1$                                     | 0.87   | 5.6  |         |       |
|      | $R_3$ (Ω cm <sup>2</sup> )                   | 11.22  | 7.6  |         |       |
|      | $Q_3$ (F cm <sup>-2</sup> s <sup>φ-1</sup> ) | 0.005  | 4.18 |         |       |
|      | $\phi_3$                                     | 0.80   | 1.39 |         |       |
|      | $R_4$ (Ω cm <sup>2</sup> )                   | 22.7   | 3.91 |         |       |
|      | $Q_4$ (F cm <sup>-2</sup> s <sup>φ-1</sup> ) | 0.005  | 3.81 |         |       |
|      | $\phi_4$                                     | 0.91   | 1.37 |         |       |
| 2000 | $R_s$ (Ω cm <sup>2</sup> )                   | 1.76   | 4.07 | 0.0001  | 1.13  |
|      | $R_1$ (Ω cm <sup>2</sup> )                   | 1.47   | 2.34 |         |       |
|      | $Q_1$ (F cm <sup>-2</sup> s <sup>φ-1</sup> ) | 0.0002 | 7.4  |         |       |
|      | $\phi_1$                                     | 0.91   | 6.9  |         |       |
|      | $R_3$ (Ω cm <sup>2</sup> )                   | 11.05  | 3.43 |         |       |



|      |                                              |        |      |        |      |
|------|----------------------------------------------|--------|------|--------|------|
|      | $Q_3$ (F cm <sup>-2</sup> s <sup>φ-1</sup> ) | 0.005  | 2.75 |        |      |
|      | $\phi_3$                                     | 0.793  | 1.1  |        |      |
|      | $R_4$ (Ω cm <sup>2</sup> )                   | 22     | 4.45 |        |      |
|      | $Q_4$ (F cm <sup>-2</sup> s <sup>φ-1</sup> ) | 0.005  | 4.52 |        |      |
|      | $\phi_4$                                     | 0.88   | 1.73 |        |      |
| 2400 | $R_s$ (Ω cm <sup>2</sup> )                   | 1.76   | 4.07 | 0.0001 | 1.27 |
|      | $R_1$ (Ω cm <sup>2</sup> )                   | 1.47   | 2.34 |        |      |
|      | $Q_1$ (F cm <sup>-2</sup> s <sup>φ-1</sup> ) | 0.0002 | 7.4  |        |      |
|      | $\phi_1$                                     | 0.91   | 6.9  |        |      |
|      | $R_3$ (Ω cm <sup>2</sup> )                   | 11.05  | 3.43 |        |      |
|      | $Q_3$ (F cm <sup>-2</sup> s <sup>φ-1</sup> ) | 0.005  | 2.75 |        |      |
|      | $\phi_3$                                     | 0.793  | 1.1  |        |      |
|      | $R_4$ (Ω cm <sup>2</sup> )                   | 21.7   | 5.69 |        |      |
|      | $Q_4$ (F cm <sup>-2</sup> s <sup>φ-1</sup> ) | 0.004  | 5.66 |        |      |
|      | $\phi_4$                                     | 0.88   | 2.02 |        |      |

**Table ST14** Parameters obtained by fitting the EIS pattern recorded at equilibrium potential (~195 mV) for various rotation rates on Nafion-containing carbon-modified GCD in 5 mM of AQDSH<sub>2</sub> dissolved in 1 M H<sub>2</sub>SO<sub>4</sub>.

| Rotation speed of | Parameter | Obtained fitting value | Relative standard error | $\chi^2$ (Chi- | Relative error of the |
|-------------------|-----------|------------------------|-------------------------|----------------|-----------------------|
|-------------------|-----------|------------------------|-------------------------|----------------|-----------------------|

| the electrode (rpm) |                                                 |        | (%)  | square) | measured impedance |
|---------------------|-------------------------------------------------|--------|------|---------|--------------------|
| 400                 | $R_s$ ( $\Omega \text{ cm}^2$ )                 | 2.04   | 1.19 | 0.0003  | 1.83               |
|                     | $R_1$ ( $\Omega \text{ cm}^2$ )                 | 4.23   | 2.34 |         |                    |
|                     | $Q_1$ ( $\text{F cm}^{-2} \text{ s}^{\phi-1}$ ) | 0.0004 | 6.71 |         |                    |
|                     | $\phi_1$                                        | 0.74   | 4.08 |         |                    |
|                     | $R_3$ ( $\Omega \text{ cm}^2$ )                 | 26.22  | 4.15 |         |                    |
|                     | $Q_3$ ( $\text{F cm}^{-2} \text{ s}^{\phi-1}$ ) | 0.0007 | 1.05 |         |                    |
|                     | $\phi_3$                                        | 0.784  | 3.02 |         |                    |
|                     | $R_4$ ( $\Omega \text{ cm}^2$ )                 | 55.07  | 4.47 |         |                    |
|                     | $Q_4$ ( $\text{F cm}^{-2} \text{ s}^{\phi-1}$ ) | 0.005  | 4.47 |         |                    |
|                     | $\phi_4$                                        | 0.86   | 2.93 |         |                    |
| 800                 | $R_s$ ( $\Omega \text{ cm}^2$ )                 | 2.04   | 1.19 | 0.0002  | 1.63               |
|                     | $R_1$ ( $\Omega \text{ cm}^2$ )                 | 4.23   | 1.25 |         |                    |
|                     | $Q_1$ ( $\text{F cm}^{-2} \text{ s}^{\phi-1}$ ) | 0.0004 | 2.71 |         |                    |
|                     | $\phi_1$                                        | 0.72   | 3.38 |         |                    |
|                     | $R_3$ ( $\Omega \text{ cm}^2$ )                 | 26.22  | 8.15 |         |                    |
|                     | $Q_3$ ( $\text{F cm}^{-2} \text{ s}^{\phi-1}$ ) | 0.0007 | 1.05 |         |                    |
|                     | $\phi_3$                                        | 0.824  | 3.05 |         |                    |
|                     | $R_4$ ( $\Omega \text{ cm}^2$ )                 | 40.5   | 6.08 |         |                    |
|                     | $Q_4$ ( $\text{F cm}^{-2} \text{ s}^{\phi-1}$ ) | 0.004  | 5.7  |         |                    |
|                     | $\phi_4$                                        | 0.89   | 3.29 |         |                    |

|      |                                             |        |      |        |      |
|------|---------------------------------------------|--------|------|--------|------|
| 1200 | $R_s (\Omega \text{ cm}^2)$                 | 2.04   | 1.19 | 0.0002 | 1.54 |
|      | $R_1 (\Omega \text{ cm}^2)$                 | 4.24   | 1.35 |        |      |
|      | $Q_1 (\text{F cm}^{-2} \text{ s}^{\phi-1})$ | 0.0004 | 2.47 |        |      |
|      | $\phi_1$                                    | 0.72   | 2.94 |        |      |
|      | $R_3 (\Omega \text{ cm}^2)$                 | 26.2   | 7.54 |        |      |
|      | $Q_3 (\text{F cm}^{-2} \text{ s}^{\phi-1})$ | 0.0007 | 3.23 |        |      |
|      | $\phi_3$                                    | 0.864  | 3.05 |        |      |
|      | $R_4 (\Omega \text{ cm}^2)$                 | 35.8   | 7.01 |        |      |
|      | $Q_4 (\text{F cm}^{-2} \text{ s}^{\phi-1})$ | 0.003  | 6.9  |        |      |
|      | $\phi_4$                                    | 0.898  | 3.35 |        |      |
| 1600 | $R_s (\Omega \text{ cm}^2)$                 | 2.04   | 1.19 | 0.0002 | 1.49 |
|      | $R_1 (\Omega \text{ cm}^2)$                 | 4.29   | 1.39 |        |      |
|      | $Q_1 (\text{F cm}^{-2} \text{ s}^{\phi-1})$ | 0.0004 | 1.89 |        |      |
|      | $\phi_1$                                    | 0.72   | 2.94 |        |      |
|      | $R_3 (\Omega \text{ cm}^2)$                 | 26.2   | 7.54 |        |      |
|      | $Q_3 (\text{F cm}^{-2} \text{ s}^{\phi-1})$ | 0.0007 | 3.03 |        |      |
|      | $\phi_3$                                    | 0.864  | 3.05 |        |      |
|      | $R_4 (\Omega \text{ cm}^2)$                 | 33.9   | 1.14 |        |      |
|      | $Q_4 (\text{F cm}^{-2} \text{ s}^{\phi-1})$ | 0.002  | 8.13 |        |      |
|      | $\phi_4$                                    | 0.89   | 3.41 |        |      |
| 2000 | $R_s (\Omega \text{ cm}^2)$                 | 2.04   | 1.19 |        |      |
|      | $R_1 (\Omega \text{ cm}^2)$                 | 4.24   | 1.35 |        |      |
|      | $Q_1 (\text{F cm}^{-2} \text{ s}^{\phi-1})$ | 0.0004 | 2.47 |        |      |

|      |                                             |        |      |        |      |
|------|---------------------------------------------|--------|------|--------|------|
|      | $\phi_1$                                    | 0.72   | 2.94 | 0.0002 | 1.42 |
|      | $R_3 (\Omega \text{ cm}^2)$                 | 26.22  | 7.54 |        |      |
|      | $Q_3 (\text{F cm}^{-2} \text{ s}^{\phi-1})$ | 0.0007 | 3.23 |        |      |
|      | $\phi_3$                                    | 0.864  | 3.05 |        |      |
|      | $R_4 (\Omega \text{ cm}^2)$                 | 31.25  | 7.95 |        |      |
|      | $Q_4 (\text{F cm}^{-2} \text{ s}^{\phi-1})$ | 0.002  | 8.9  |        |      |
|      | $\phi_4$                                    | 0.90   | 3.62 |        |      |
| 2400 | $R_s (\Omega \text{ cm}^2)$                 | 2.04   | 1.19 | 0.0002 | 1.49 |
|      | $R_1 (\Omega \text{ cm}^2)$                 | 4.24   | 1.35 |        |      |
|      | $Q_1 (\text{F cm}^{-2} \text{ s}^{\phi-1})$ | 0.0004 | 2.47 |        |      |
|      | $\phi_1$                                    | 0.72   | 2.94 |        |      |
|      | $R_3 (\Omega \text{ cm}^2)$                 | 26.22  | 7.54 |        |      |
|      | $Q_3 (\text{F cm}^{-2} \text{ s}^{\phi-1})$ | 0.0007 | 3.23 |        |      |
|      | $\phi_3$                                    | 0.864  | 3.11 |        |      |
|      | $R_4 (\Omega \text{ cm}^2)$                 | 26.5   | 1.82 |        |      |
|      | $Q_4 (\text{F cm}^{-2} \text{ s}^{\phi-1})$ | 0.002  | 1.98 |        |      |
|      | $\phi_4$                                    | 0.894  | 3.85 |        |      |

### IR compensation

IR compensation for solution resistance ( $R_s$ ): From the fitting parameters of the EIS pattern, solution resistance is obtained. The IR drop due to the solution resistance ( $R_s$ ) is calculated, and subtracted this drop from the applied potential. By plotting this corrected voltage and the current,  $R_s$  drop corrected LSV is obtained. Similarly, the same procedure is applied for resistance to the

transport process ( $R_2$ ), internal mass-transport resistance ( $R_3$ ), and external mass-transport resistance ( $R_4$ ), to obtain their respective resistance corrected LSVs.
